# Supplementary material for: Rapid Detection and Trapping of Extracellular Vesicles by Electrokinetic Concentration for Liquid Biopsy on Chip
Source: MDPI journal article supplement (doi:10.3390/mi9060306), 2018-06-19
Supplement: s1 [file s1]

# Supplementary Materials: Rapid Detection and Trapping of Extracellular Vesicles by Electrokinetic Concentration for Liquid Biopsy on Chip

Lucia S. Cheung, Sarah Sahloul, Ajymurat Orozaliev and Yong-Ak Song

## 1. Standard Curve for EXOCET Exosome Quantification Essay

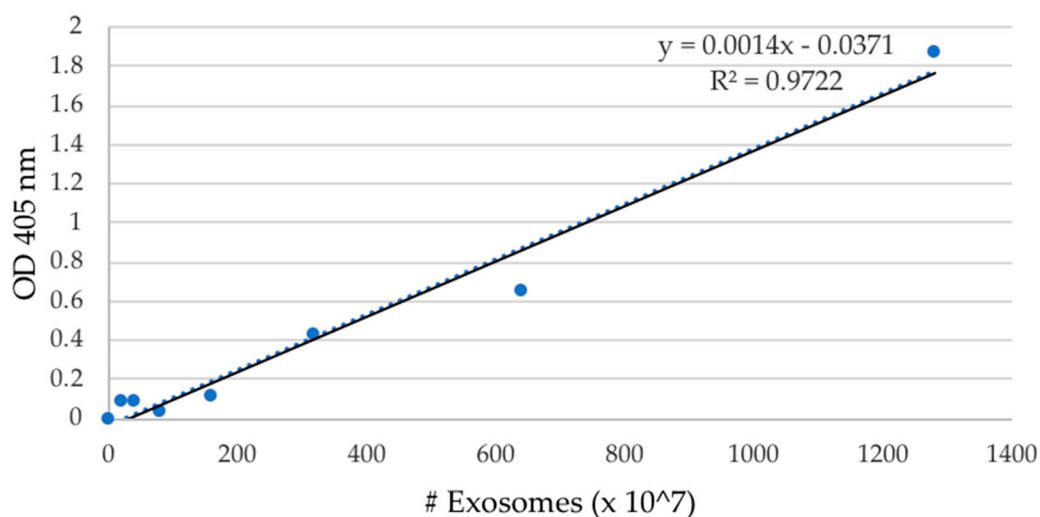

**Figure S1.** The standard curve provided by the EXOCET assay kit is calibrated to the signal detected from a number of exosomes as measured by NanoSight (NTA) analysis. To quantify our exosomes, the sample readings are plotted on the standard curve.

## 2. Calibration Curve

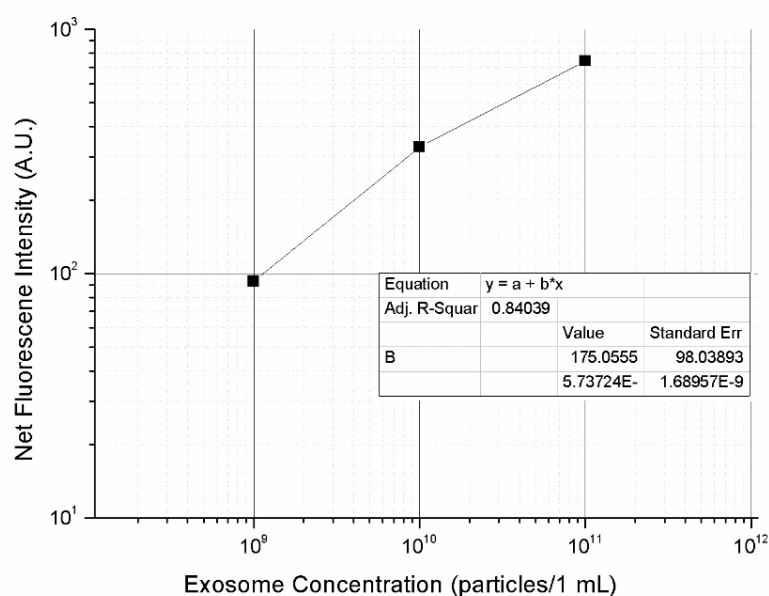

**Figure S2.** Characterization of exosomes concentration with fluorescence signal intensity without ICP. Net fluorescence intensity of the microchannel filled with labelled exosomes without ICP of known concentrations  $5.0 \times 10^9$  particles/1 mL,  $5.0 \times 10^{10}$  particles/1 mL and  $5.0 \times 10^{11}$  particles/1 mL.  $5.0 \times 10^9$  particles/1 mL is our detection limit without ICP.

## 3. Video of Exosome Concentration during ICP

Video S1: This video shows electrokinetic concentration of EVs during ICP at 45 V/cm starting from an initial concentration of  $5.0 \times 10^9$  particles/1 mL.
